# Supplementary material for: Impact of the particle mixing state on the hygroscopicity of internally mixed sodium chloride–ammonium sulfate single droplets: a theoretical and experimental study
Source: Royal Society of Chemistry journal article supplement (doi:10.1039/d1cp01574e), 2021-01-01
Supplement: d1cp01574e1.pdf [file d1cp01574e1.pdf]

## Supporting Information

# Impact of the particle mixing state on the hygroscopicity of internally mixed sodium chloride-ammonium sulfate single droplets: A theoretical and experimental study

Yeny A. Tobon,<sup>a\*</sup> Danielle El Hajj,<sup>a,b</sup> Samantha Seng,<sup>a</sup> Ferdaous Bengrad,<sup>a</sup> Myriam Moreau,<sup>a</sup> Nicolas Visez,<sup>a</sup> Isabelle Chiapello,<sup>b</sup> Suzanne Crumeyrolle,<sup>b</sup> Marie Choël<sup>a\*</sup>

<sup>a</sup>Univ. Lille, CNRS, UMR 8516 - LASIRE - Laboratoire de Spectroscopie pour les Interactions, la Réactivité et l'Environnement, F-59000 Lille, France.

<sup>b</sup>Univ. Lille, CNRS, UMR 8518 - LOA - Laboratoire d'Optique Atmosphérique, F-59000 Lille, France.

\* Corresponding authors: yeny.tobon-correa@univ-lille.fr / [marie.choel@univ-lille.fr](mailto:marie.choel@univ-lille.fr)

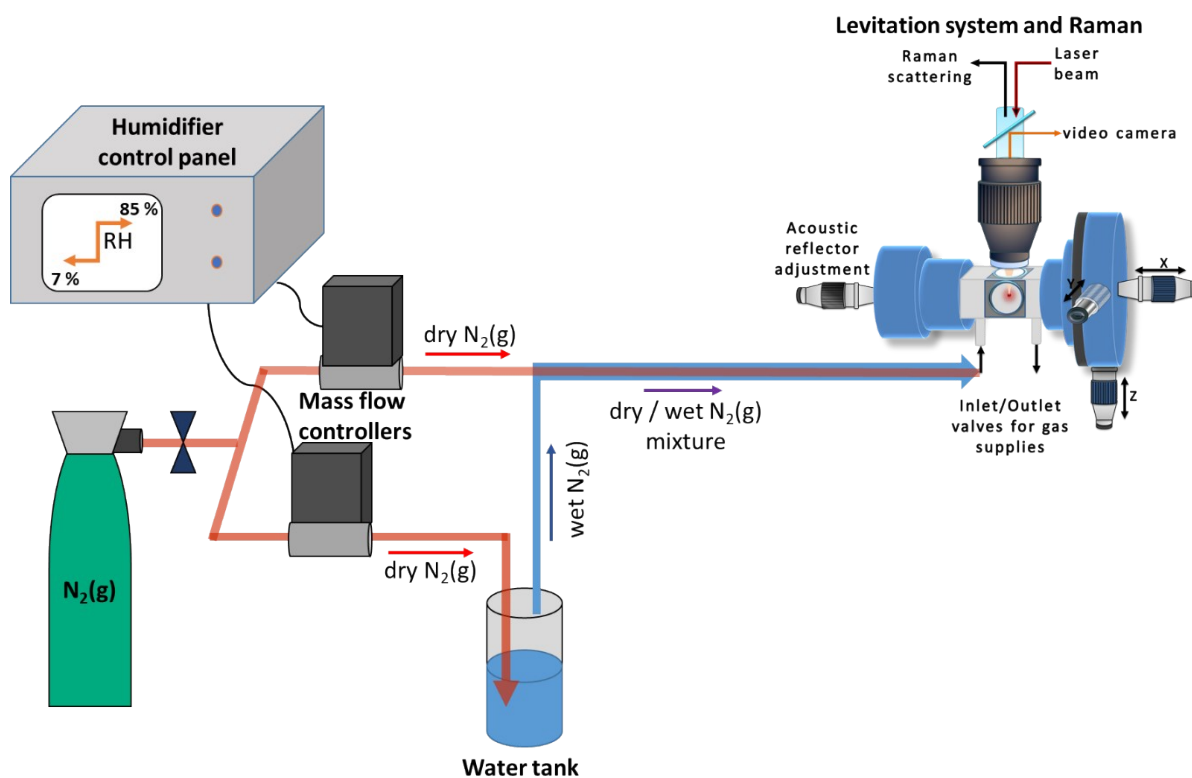

**Fig. S1** Schematic diagram of experimental setup

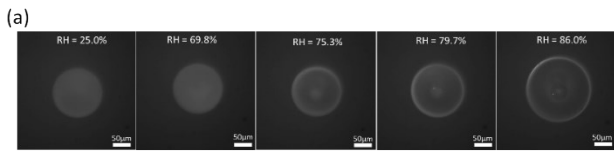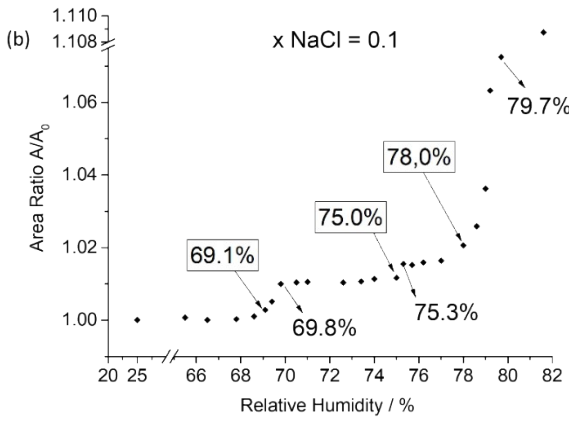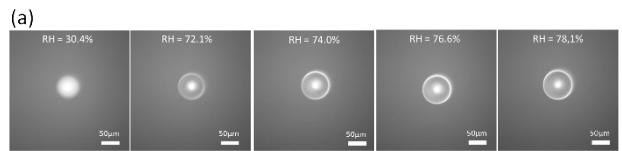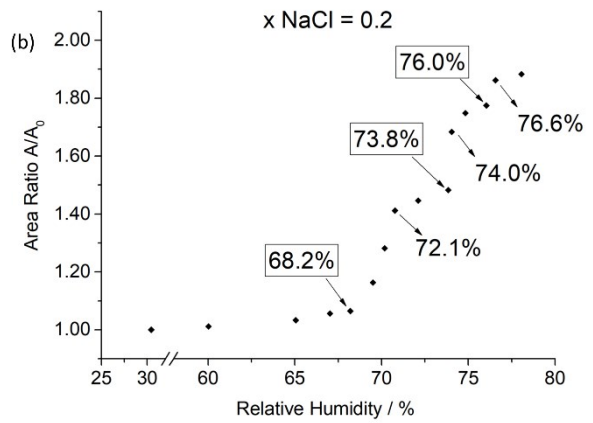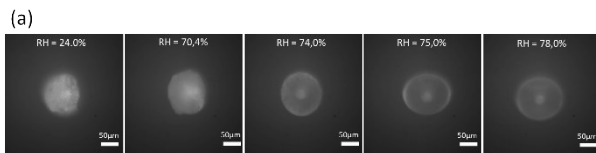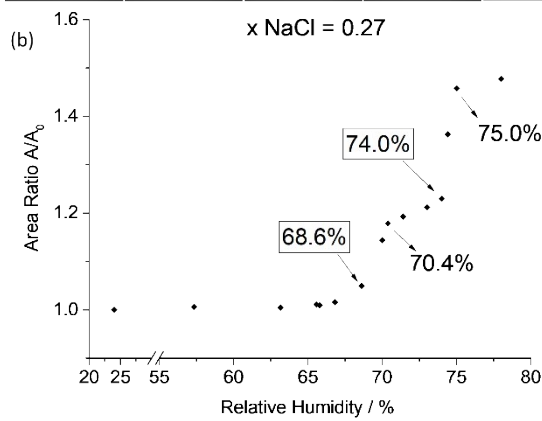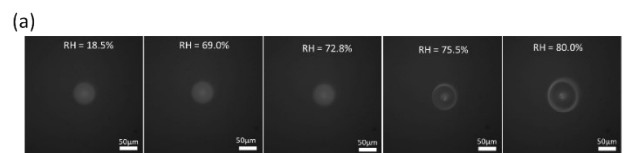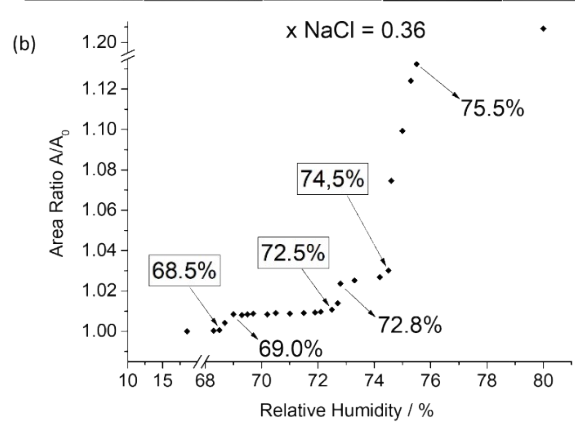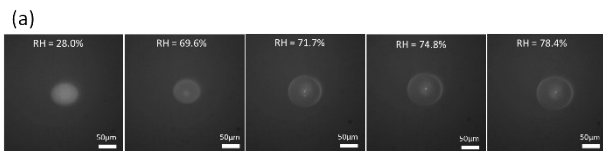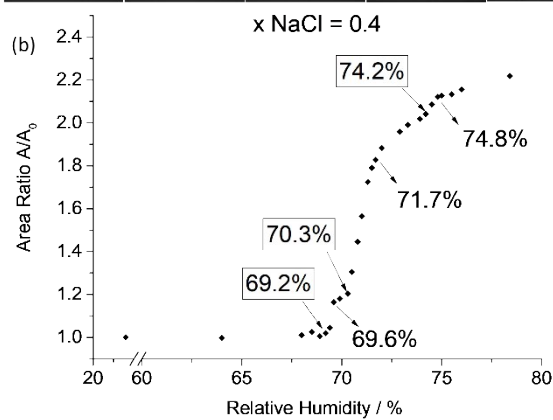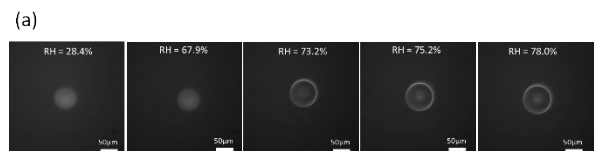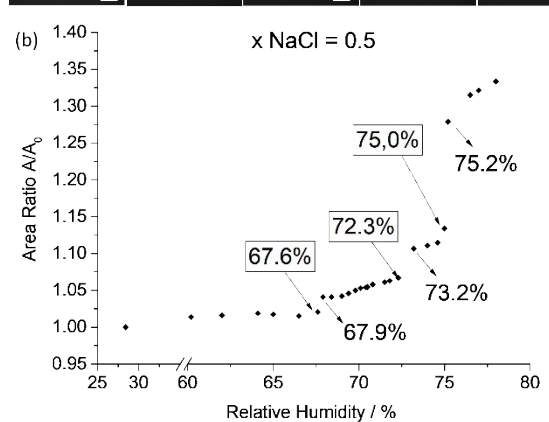

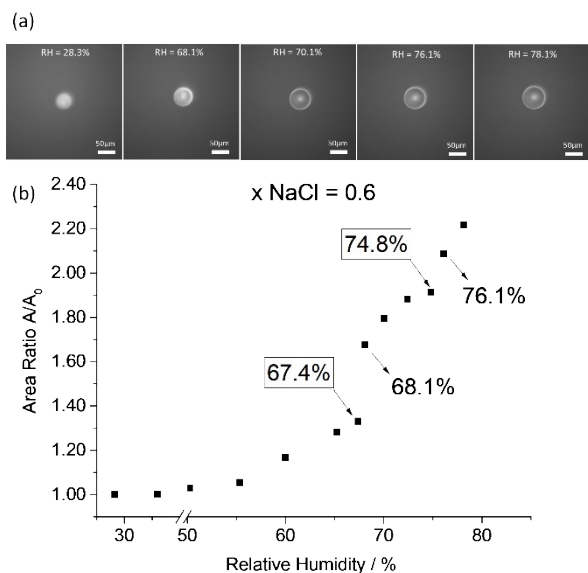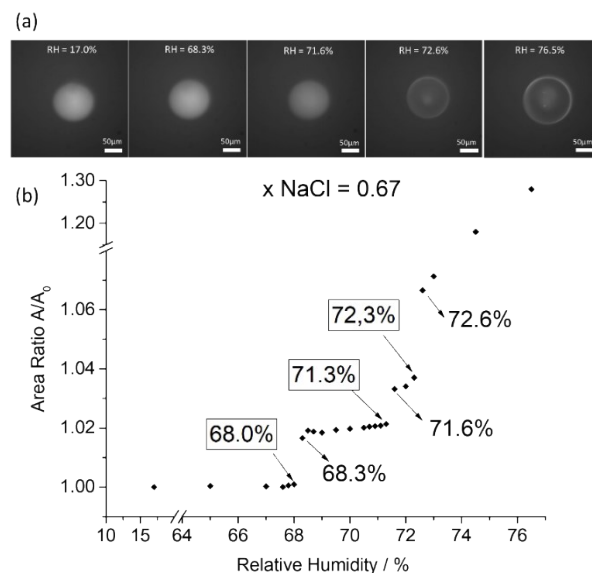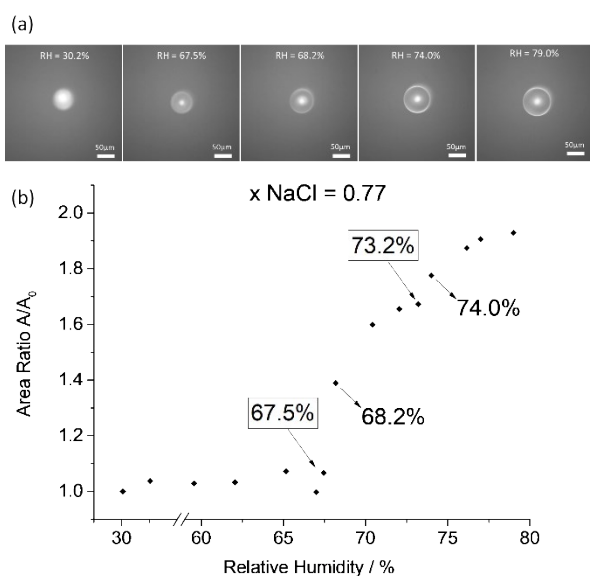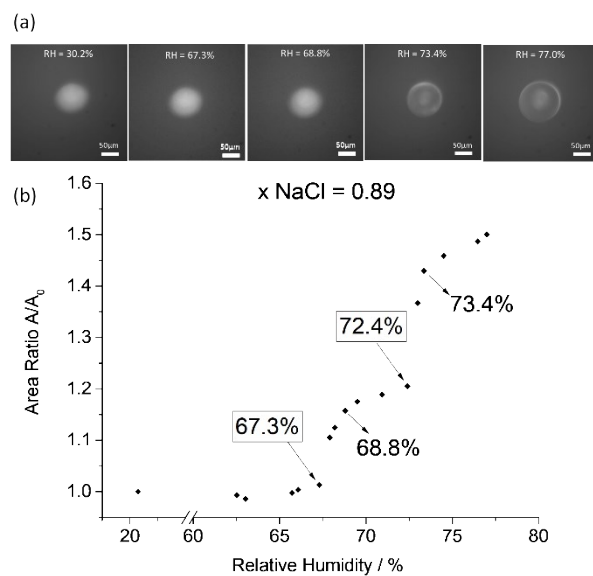

**Fig. S2** (a) Optical images and (b) humidograms of mixed single particles of NaCl/ $(\text{NH}_4)_2\text{SO}_4$  containing NaCl mole fraction of 0.1, 0.2, 0.27, 0.36, 0.4, 0.5, 0.6, 0.67, 0.77 and 0.89.

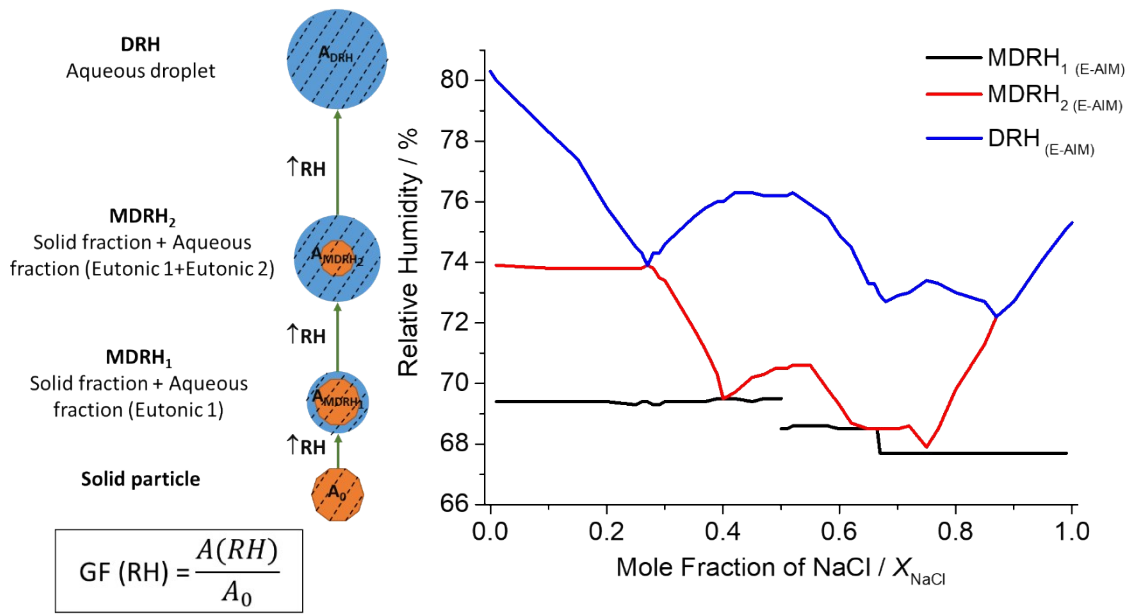

**Fig. S3** Illustration of the phase transitions of internally mixed NaCl/(NH<sub>4</sub>)<sub>2</sub>SO<sub>4</sub> particles.

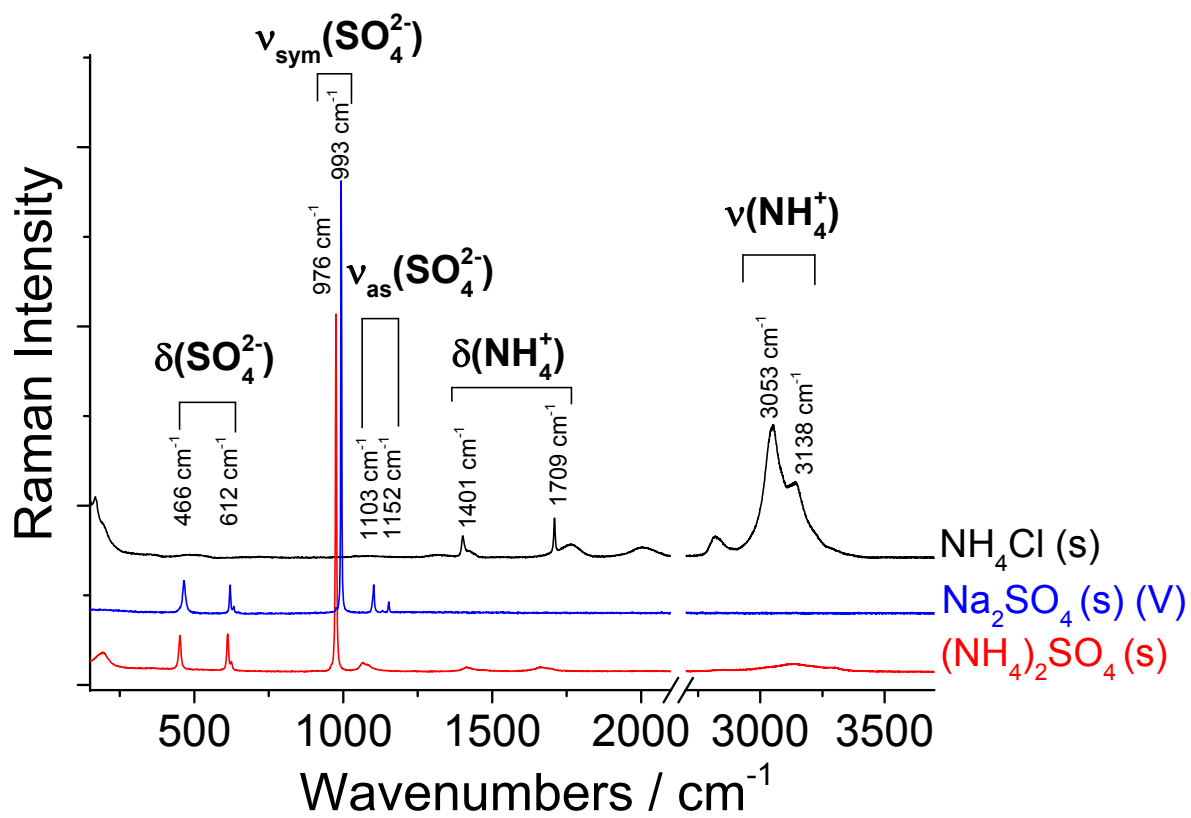

Fig. S4. Raman spectra of pure solid  $\text{NH}_4\text{Cl}$ ,  $\text{Na}_2\text{SO}_4$  and  $(\text{NH}_4)_2\text{SO}_4$

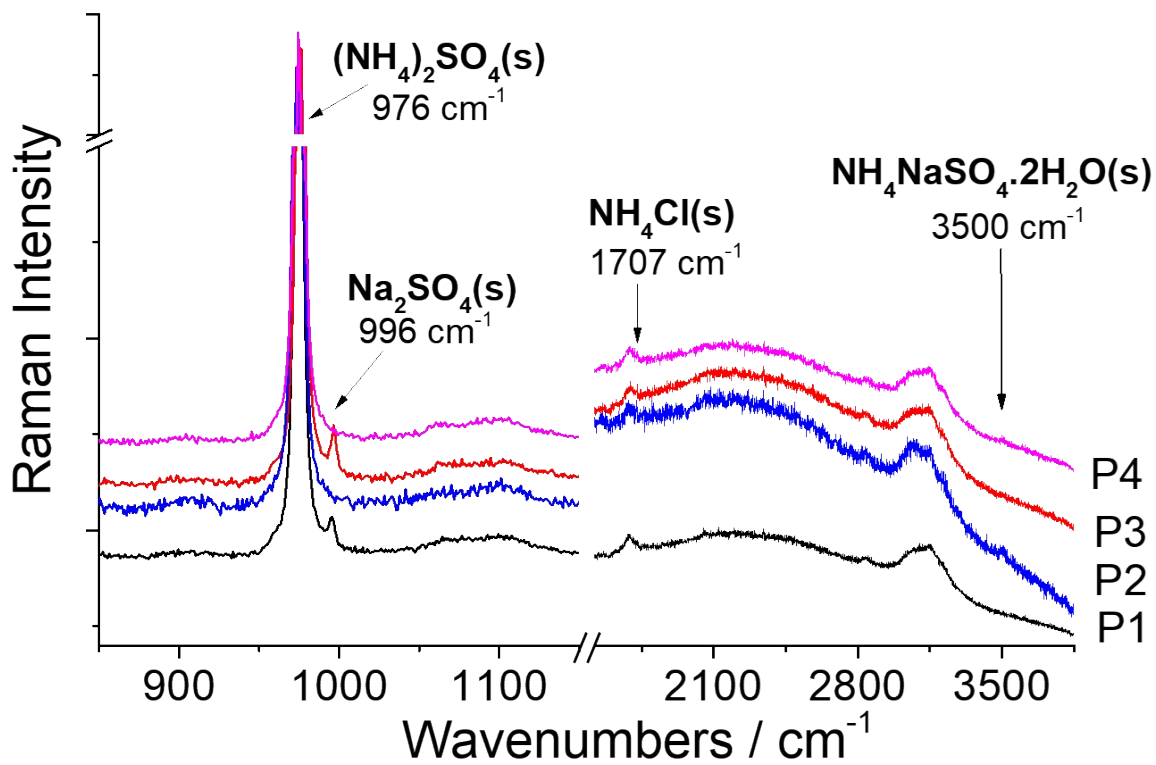

**Figure S5.** Raman spectra showing variable composition of several levitated dried particles containing mixed  $\text{NaCl}/(\text{NH}_4)_2\text{SO}_4$  ( $x_{\text{NaCl}} = 0.1$ )

**Table S1.** Summary list of input parameters used in E-AIM model

|                                                         |                                                            |                       |                       |                                   |                                   |
|---------------------------------------------------------|------------------------------------------------------------|-----------------------|-----------------------|-----------------------------------|-----------------------------------|
| <b>E-AIM model</b>                                      | Model III                                                  |                       |                       |                                   |                                   |
| <b>Type of calculation</b>                              | Parametric, varying: (a) relative humidity, or total water |                       |                       |                                   |                                   |
| <b>Output</b>                                           | Column                                                     |                       |                       |                                   |                                   |
| <b>Water content of the system</b>                      | Relative humidity                                          |                       |                       |                                   |                                   |
| <b>Start value</b>                                      | 0.65                                                       |                       |                       |                                   |                                   |
| <b>End value</b>                                        | 0.85                                                       |                       |                       |                                   |                                   |
| <b>No. of points</b>                                    | 100                                                        |                       |                       |                                   |                                   |
| <b>Inorganic composition in moles per m<sup>3</sup></b> | <b>xNaCl</b>                                               | <b>Na<sup>+</sup></b> | <b>Cl<sup>-</sup></b> | <b>NH<sub>4</sub><sup>+</sup></b> | <b>SO<sub>4</sub><sup>-</sup></b> |
|                                                         | <b>0</b>                                                   | 0                     | 0                     | 2                                 | 1                                 |
|                                                         | <b>0.1</b>                                                 | 0.1                   | 0.1                   | 1.8                               | 0.9                               |
|                                                         | <b>0.2</b>                                                 | 0.2                   | 0.2                   | 1.6                               | 0.8                               |
|                                                         | <b>0.27</b>                                                | 0.27                  | 0.27                  | 1.46                              | 0.73                              |
|                                                         | <b>0.36</b>                                                | 0.36                  | 0.36                  | 1.28                              | 0.64                              |
|                                                         | <b>0.4</b>                                                 | 0.4                   | 0.4                   | 1.2                               | 0.6                               |
|                                                         | <b>0.5</b>                                                 | 0.5                   | 0.5                   | 1                                 | 0.5                               |
|                                                         | <b>0.55</b>                                                | 0.55                  | 0.55                  | 0.9                               | 0.45                              |
|                                                         | <b>0.6</b>                                                 | 0.6                   | 0.6                   | 0.8                               | 0.4                               |
|                                                         | <b>0.67</b>                                                | 0.67                  | 0.67                  | 0.66                              | 0.33                              |
|                                                         | <b>0.77</b>                                                | 0.77                  | 0.77                  | 0.46                              | 0.23                              |
| <b>0.89</b>                                             | 0.89                                                       | 0.89                  | 0.22                  | 0.11                              |                                   |
| <b>1</b>                                                | 1                                                          | 1                     | 0                     | 0                                 |                                   |
| <b>Trace gases</b>                                      | Default: partitioning is calculated for each gas           |                       |                       |                                   |                                   |
| <b>Solid phases</b>                                     | Default: all solids can form                               |                       |                       |                                   |                                   |

**Table S2.** E-AIM simulation of chemical species and concentrations, at different humidification levels, of a particle initially containing 0.1 mol.m<sup>-3</sup> of Na<sup>+</sup> and Cl<sup>-</sup>, 1.8 mol.m<sup>-3</sup> of NH<sub>4</sub><sup>+</sup> and 0.9 mol.m<sup>-3</sup> of SO<sub>4</sub><sup>2-</sup> (xNaCl = 0.1).

| State                                   | Aqueous phase                                                                                                                                                                |                                                  |                  | Solid phase                                                                                                                                       |                           |          |
|-----------------------------------------|------------------------------------------------------------------------------------------------------------------------------------------------------------------------------|--------------------------------------------------|------------------|---------------------------------------------------------------------------------------------------------------------------------------------------|---------------------------|----------|
| <b>Solid</b>                            | <b>Species</b>                                                                                                                                                               | <b>mol.m<sup>-3</sup></b>                        | <b>X</b>         | <b>Species</b>                                                                                                                                    | <b>mol.m<sup>-3</sup></b> | <b>X</b> |
|                                         | Na <sup>+</sup>                                                                                                                                                              | 0.000                                            | 0.000            | Na <sup>+</sup>                                                                                                                                   | 0.100                     | 0.035    |
|                                         | Cl <sup>-</sup>                                                                                                                                                              | 0.000                                            | 0.000            | Cl <sup>-</sup>                                                                                                                                   | 0.100                     | 0.035    |
|                                         | NH <sub>4</sub> <sup>+</sup>                                                                                                                                                 | 0.000                                            | 0.000            | NH <sub>4</sub> <sup>+</sup>                                                                                                                      | 1.800                     | 0.620    |
|                                         | SO <sub>4</sub> <sup>2-</sup>                                                                                                                                                | 0.000                                            | 0.000            | SO <sub>4</sub> <sup>2-</sup>                                                                                                                     | 0.900                     | 0.310    |
|                                         | total                                                                                                                                                                        | 0.000                                            | 0.000            | total                                                                                                                                             | 2.900                     | 1.000    |
| <b>mol.m<sup>-3</sup></b>               | 0                                                                                                                                                                            |                                                  |                  | NH <sub>4</sub> Cl=0.100 ; (NH <sub>4</sub> ) <sub>2</sub> SO <sub>4</sub> =0.800 ;<br>NH <sub>4</sub> NaSO <sub>4</sub> ·2H <sub>2</sub> O=0.100 |                           |          |
| <b>MDRH<sub>1</sub></b><br><b>69.4%</b> | <b>Species</b>                                                                                                                                                               | <b>mol.m<sup>-3</sup></b>                        | <b>X</b>         | <b>Species</b>                                                                                                                                    | <b>mol.m<sup>-3</sup></b> | <b>X</b> |
|                                         | Na <sup>+</sup>                                                                                                                                                              | 0.040                                            | 0.088            | Na <sup>+</sup>                                                                                                                                   | 0.060                     | 0.025    |
|                                         | Cl <sup>-</sup>                                                                                                                                                              | 0.100                                            | 0.220            | Cl <sup>-</sup>                                                                                                                                   | 0.000                     | 0.000    |
|                                         | NH <sub>4</sub> <sup>+</sup>                                                                                                                                                 | 0.230                                            | 0.505            | NH <sub>4</sub> <sup>+</sup>                                                                                                                      | 1.570                     | 0.642    |
|                                         | SO <sub>4</sub> <sup>2-</sup>                                                                                                                                                | 0.085                                            | 0.187            | SO <sub>4</sub> <sup>2-</sup>                                                                                                                     | 0.815                     | 0.333    |
|                                         | total                                                                                                                                                                        | 0.455                                            | 1.000            | total                                                                                                                                             | 2.445                     | 1.000    |
| <b>mol.m<sup>-3</sup></b>               | First solubilized species: NH <sub>4</sub> Cl=0.100 ;<br>(NH <sub>4</sub> ) <sub>2</sub> SO <sub>4</sub> =0.045 ; NH <sub>4</sub> NaSO <sub>4</sub> ·2H <sub>2</sub> O=0.040 |                                                  |                  | (NH <sub>4</sub> ) <sub>2</sub> SO <sub>4</sub> =0.755 ; NH <sub>4</sub> NaSO <sub>4</sub> ·2H <sub>2</sub> O=0.060                               |                           |          |
| <b>MDRH<sub>2</sub></b><br><b>73.8%</b> | <b>Species</b>                                                                                                                                                               | <b>mol.m<sup>-3</sup></b><br><b>(accumulate)</b> | <b>X</b>         | <b>Species</b>                                                                                                                                    | <b>mol.m<sup>-3</sup></b> | <b>X</b> |
|                                         | Na <sup>+</sup>                                                                                                                                                              | 0.060<br>(0.100)                                 | 0.108<br>(0.099) | Na <sup>+</sup>                                                                                                                                   | 0.000                     | 0.000    |
|                                         | Cl <sup>-</sup>                                                                                                                                                              | 0.000<br>(0.100)                                 | 0.000<br>(0.099) | Cl <sup>-</sup>                                                                                                                                   | 0.000                     | 0.000    |
|                                         | NH <sub>4</sub> <sup>+</sup>                                                                                                                                                 | 0.310<br>(0.540)                                 | 0.559<br>(0.535) | NH <sub>4</sub> <sup>+</sup>                                                                                                                      | 1.260                     | 0.667    |
|                                         | SO <sub>4</sub> <sup>2-</sup>                                                                                                                                                | 0.185<br>(0.270)                                 | 0.333<br>(0.267) | SO <sub>4</sub> <sup>2-</sup>                                                                                                                     | 0.630                     | 0.333    |
|                                         | total                                                                                                                                                                        | 0.555<br>(1.010)                                 | 1.000<br>(1.000) | total                                                                                                                                             | 1.890                     | 1.000    |
| <b>mol.m<sup>-3</sup></b>               | Second solubilized species: (NH <sub>4</sub> ) <sub>2</sub> SO <sub>4</sub> =0.125 ;<br>NH <sub>4</sub> NaSO <sub>4</sub> ·2H <sub>2</sub> O=0.060                           |                                                  |                  | (NH <sub>4</sub> ) <sub>2</sub> SO <sub>4</sub> =0.630                                                                                            |                           |          |
| <b>DRH</b><br><b>78.4%</b>              | <b>Species</b>                                                                                                                                                               | <b>mol.m<sup>-3</sup></b><br><b>(accumulate)</b> | <b>X</b>         | <b>Species</b>                                                                                                                                    | <b>mol.m<sup>-3</sup></b> | <b>X</b> |
|                                         | Na <sup>+</sup>                                                                                                                                                              | 0.000<br>(0.100)                                 | 0.000<br>(0.034) | Na <sup>+</sup>                                                                                                                                   | 0.000                     | 0.000    |
|                                         | Cl <sup>-</sup>                                                                                                                                                              | 0.000<br>(0.100)                                 | 0.000<br>(0.034) | Cl <sup>-</sup>                                                                                                                                   | 0.000                     | 0.000    |
|                                         | NH <sub>4</sub> <sup>+</sup>                                                                                                                                                 | 1.260<br>(1.800)                                 | 0.667<br>(0.621) | NH <sub>4</sub> <sup>+</sup>                                                                                                                      | 0.000                     | 0.000    |
|                                         | SO <sub>4</sub> <sup>2-</sup>                                                                                                                                                | 0.630<br>(0.900)                                 | 0.333<br>(0.310) | SO <sub>4</sub> <sup>2-</sup>                                                                                                                     | 0.000                     | 0.000    |
|                                         | total                                                                                                                                                                        | 1.890<br>(2.900)                                 | 1.000<br>(1.000) | total                                                                                                                                             | 0.000                     | 0.000    |
| <b>mol.m<sup>-3</sup></b>               | Last solubilized species: (NH <sub>4</sub> ) <sub>2</sub> SO <sub>4</sub> =0.630                                                                                             |                                                  |                  | 0                                                                                                                                                 |                           |          |



**Table S3.** E-AIM simulation of chemical species and concentrations, at different humidification levels, of a particle initially containing 0.36 mol.m<sup>-3</sup> of Na<sup>+</sup> and Cl<sup>-</sup>, 1.28 mol.m<sup>-3</sup> of NH<sub>4</sub><sup>+</sup> and 0.64 mol.m<sup>-3</sup> of SO<sub>4</sub><sup>2-</sup> (xNaCl = 0.36).

| State                                   | Aqueous phase                                                                                                                                                               |                                                  |                  | Solid phase                                                                                                                                      |                           |          |
|-----------------------------------------|-----------------------------------------------------------------------------------------------------------------------------------------------------------------------------|--------------------------------------------------|------------------|--------------------------------------------------------------------------------------------------------------------------------------------------|---------------------------|----------|
| <b>Solid</b>                            | <b>Species</b>                                                                                                                                                              | <b>mol.m<sup>-3</sup></b>                        | <b>X</b>         | <b>Species</b>                                                                                                                                   | <b>mol.m<sup>-3</sup></b> | <b>X</b> |
|                                         | Na <sup>+</sup>                                                                                                                                                             | 0.000                                            | 0.000            | Na <sup>+</sup>                                                                                                                                  | 0.360                     | 0.136    |
|                                         | Cl <sup>-</sup>                                                                                                                                                             | 0.000                                            | 0.000            | Cl <sup>-</sup>                                                                                                                                  | 0.360                     | 0.136    |
|                                         | NH <sub>4</sub> <sup>+</sup>                                                                                                                                                | 0.000                                            | 0.000            | NH <sub>4</sub> <sup>+</sup>                                                                                                                     | 1.280                     | 0.485    |
|                                         | SO <sub>4</sub> <sup>2-</sup>                                                                                                                                               | 0.000                                            | 0.000            | SO <sub>4</sub> <sup>2-</sup>                                                                                                                    | 0.640                     | 0.242    |
|                                         | total                                                                                                                                                                       | 0.000                                            | 0.000            | total                                                                                                                                            | 2.640                     | 1.000    |
| <b>mol.m<sup>-3</sup></b>               | 0                                                                                                                                                                           |                                                  |                  | (NH <sub>4</sub> ) <sub>2</sub> SO <sub>4</sub> =0.280 ; NH <sub>4</sub> NaSO <sub>4</sub> .2H <sub>2</sub> O=0.360;<br>NH <sub>4</sub> Cl=0.360 |                           |          |
| <b>MDRH<sub>1</sub></b><br><b>69.4%</b> | <b>Species</b>                                                                                                                                                              | <b>mol.m<sup>-3</sup></b>                        | <b>X</b>         | <b>Species</b>                                                                                                                                   | <b>mol.m<sup>-3</sup></b> | <b>X</b> |
|                                         | Na <sup>+</sup>                                                                                                                                                             | 0.144                                            | 0.088            | Na <sup>+</sup>                                                                                                                                  | 0.216                     | 0.216    |
|                                         | Cl <sup>-</sup>                                                                                                                                                             | 0.360                                            | 0.219            | Cl <sup>-</sup>                                                                                                                                  | 0.000                     | 0.000    |
|                                         | NH <sub>4</sub> <sup>+</sup>                                                                                                                                                | 0.830                                            | 0.506            | NH <sub>4</sub> <sup>+</sup>                                                                                                                     | 0.450                     | 0.450    |
|                                         | SO <sub>4</sub> <sup>2-</sup>                                                                                                                                               | 0.307                                            | 0.187            | SO <sub>4</sub> <sup>2-</sup>                                                                                                                    | 0.333                     | 0.333    |
|                                         | total                                                                                                                                                                       | 1.641                                            | 1.000            | total                                                                                                                                            | 0.999                     | 1.000    |
| <b>mol.m<sup>-3</sup></b>               | First solubilized species: (NH <sub>4</sub> ) <sub>2</sub> SO <sub>4</sub> =0.163 ;<br>NH <sub>4</sub> NaSO <sub>4</sub> .2H <sub>2</sub> O=0.144; NH <sub>4</sub> Cl=0.360 |                                                  |                  | (NH <sub>4</sub> ) <sub>2</sub> SO <sub>4</sub> =0.117 ; NH <sub>4</sub> NaSO <sub>4</sub> .2H <sub>2</sub> O= 0.216                             |                           |          |
| <b>MDRH<sub>2</sub></b><br><b>71.5%</b> | <b>Species</b>                                                                                                                                                              | <b>mol.m<sup>-3</sup></b><br><b>(accumulate)</b> | <b>X</b>         | <b>Species</b>                                                                                                                                   | <b>mol.m<sup>-3</sup></b> | <b>X</b> |
|                                         | Na <sup>+</sup>                                                                                                                                                             | 0.057<br>(0.201)                                 | 0.110<br>(0.093) | Na <sup>+</sup>                                                                                                                                  | 0.159                     | 0.333    |
|                                         | Cl <sup>-</sup>                                                                                                                                                             | 0.000<br>(0.360)                                 | 0.000<br>(0.166) | Cl <sup>-</sup>                                                                                                                                  | 0.000                     | 0.000    |
|                                         | NH <sub>4</sub> <sup>+</sup>                                                                                                                                                | 0.291<br>(1.121)                                 | 0.557<br>(0.518) | NH <sub>4</sub> <sup>+</sup>                                                                                                                     | 0.159                     | 0.333    |
|                                         | SO <sub>4</sub> <sup>2-</sup>                                                                                                                                               | 0.174<br>(0.481)                                 | 0.333<br>(0.222) | SO <sub>4</sub> <sup>2-</sup>                                                                                                                    | 0.159                     | 0.333    |
|                                         | total                                                                                                                                                                       | 0.523<br>(2.163)                                 | 1.000<br>(1.000) | total                                                                                                                                            | 0.476                     | 1.000    |
| <b>mol.m<sup>-3</sup></b>               | Second solubilized species: (NH <sub>4</sub> ) <sub>2</sub> SO <sub>4</sub> =0.117<br>; NH <sub>4</sub> NaSO <sub>4</sub> .2H <sub>2</sub> O= 0.057                         |                                                  |                  | NH <sub>4</sub> NaSO <sub>4</sub> .2H <sub>2</sub> O = 0.159                                                                                     |                           |          |
| <b>DRH</b><br><b>75.6%</b>              | <b>Species</b>                                                                                                                                                              | <b>mol.m<sup>-3</sup></b><br><b>(accumulate)</b> | <b>X</b>         | <b>Species</b>                                                                                                                                   | <b>mol.m<sup>-3</sup></b> | <b>X</b> |
|                                         | Na <sup>+</sup>                                                                                                                                                             | 0.159<br>(0.360)                                 | 0.333<br>(0.136) | Na <sup>+</sup>                                                                                                                                  | 0.00                      | 0.00     |
|                                         | Cl <sup>-</sup>                                                                                                                                                             | 0.000<br>(0.360)                                 | 0.000<br>(0.136) | Cl <sup>-</sup>                                                                                                                                  | 0.00                      | 0.00     |
|                                         | NH <sub>4</sub> <sup>+</sup>                                                                                                                                                | 0.159<br>(1.280)                                 | 0.333<br>(0.485) | NH <sub>4</sub> <sup>+</sup>                                                                                                                     | 0.00                      | 0.00     |
|                                         | SO <sub>4</sub> <sup>2-</sup>                                                                                                                                               | 0.159<br>(0.640)                                 | 0.333<br>(0.242) | SO <sub>4</sub> <sup>2-</sup>                                                                                                                    | 0.00                      | 0.00     |
|                                         | total                                                                                                                                                                       | 0.476<br>(2.640)                                 | 1.000<br>(1.000) | total                                                                                                                                            | 0.00                      | 0.00     |
| <b>mol.m<sup>-3</sup></b>               | Last solubilized species: (NH <sub>4</sub> ) <sub>2</sub> SO <sub>4</sub> = 0.159                                                                                           |                                                  |                  | 0                                                                                                                                                |                           |          |

**Table S4.** E-AIM simulation of chemical species and concentrations, at different humidification levels, of a particle initially containing 0.55 mol.m<sup>-3</sup> of Na<sup>+</sup> and Cl<sup>-</sup>, 0.90 mol.m<sup>-3</sup> of NH<sub>4</sub><sup>+</sup> and 0.45 mol.m<sup>-3</sup> of SO<sub>4</sub><sup>2-</sup> (xNaCl = 0.55).

| State                             | Aqueous phase                                                                                                                    |                                            |                  | Solid phase                                                                                           |                           |          |
|-----------------------------------|----------------------------------------------------------------------------------------------------------------------------------|--------------------------------------------|------------------|-------------------------------------------------------------------------------------------------------|---------------------------|----------|
| <b>Solid</b>                      | <b>Species</b>                                                                                                                   | <b>mol.m<sup>-3</sup></b>                  | <b>X</b>         | <b>Species</b>                                                                                        | <b>mol.m<sup>-3</sup></b> | <b>X</b> |
|                                   | Na <sup>+</sup>                                                                                                                  | 0.000                                      | 0.000            | Na <sup>+</sup>                                                                                       | 0.550                     | 0.224    |
|                                   | Cl <sup>-</sup>                                                                                                                  | 0.000                                      | 0.000            | Cl <sup>-</sup>                                                                                       | 0.550                     | 0.224    |
|                                   | NH <sub>4</sub> <sup>+</sup>                                                                                                     | 0.000                                      | 0.000            | NH <sub>4</sub> <sup>+</sup>                                                                          | 0.900                     | 0.368    |
|                                   | SO <sub>4</sub> <sup>2-</sup>                                                                                                    | 0.000                                      | 0.000            | SO <sub>4</sub> <sup>2-</sup>                                                                         | 0.450                     | 0.184    |
|                                   | total                                                                                                                            | 0.000                                      | 0.000            | total                                                                                                 | 2.450                     | 1.000    |
| <b>mol.m<sup>-3</sup></b>         | 0                                                                                                                                |                                            |                  | NaCl=0.100 ; NH <sub>4</sub> Cl=0.450 ;<br>NH <sub>4</sub> NaSO <sub>4</sub> .2H <sub>2</sub> O=0.450 |                           |          |
| <b>MDRH<sub>1</sub><br/>68.4%</b> | <b>Species</b>                                                                                                                   | <b>mol.m<sup>-3</sup></b>                  | <b>X</b>         | <b>Species</b>                                                                                        | <b>mol.m<sup>-3</sup></b> | <b>X</b> |
|                                   | Na <sup>+</sup>                                                                                                                  | 0.165                                      | 0.244            | Na <sup>+</sup>                                                                                       | 0.385                     | 0.217    |
|                                   | Cl <sup>-</sup>                                                                                                                  | 0.241                                      | 0.356            | Cl <sup>-</sup>                                                                                       | 0.309                     | 0.174    |
|                                   | NH <sub>4</sub> <sup>+</sup>                                                                                                     | 0.206                                      | 0.304            | NH <sub>4</sub> <sup>+</sup>                                                                          | 0.694                     | 0.391    |
|                                   | SO <sub>4</sub> <sup>2-</sup>                                                                                                    | 0.065                                      | 0.096            | SO <sub>4</sub> <sup>2-</sup>                                                                         | 0.385                     | 0.217    |
|                                   | total                                                                                                                            | 0.677                                      | 1.000            | total                                                                                                 | 1.773                     | 1.000    |
| <b>mol.m<sup>-3</sup></b>         | First solubilized species: NaCl=0.100 ;<br>NH <sub>4</sub> Cl=0.141 ; NH <sub>4</sub> NaSO <sub>4</sub> .2H <sub>2</sub> O=0.065 |                                            |                  | NH <sub>4</sub> Cl=0.309 ; NH <sub>4</sub> NaSO <sub>4</sub> .2H <sub>2</sub> O=0.385                 |                           |          |
| <b>MDRH<sub>2</sub><br/>70.2%</b> | <b>Species</b>                                                                                                                   | <b>mol.m<sup>-3</sup><br/>(accumulate)</b> | <b>X</b>         | <b>Species</b>                                                                                        | <b>mol.m<sup>-3</sup></b> | <b>X</b> |
|                                   | Na <sup>+</sup>                                                                                                                  | 0.139<br>(0.304)                           | 0.134<br>(0.178) | Na <sup>+</sup>                                                                                       | 0.246                     | 0.333    |
|                                   | Cl <sup>-</sup>                                                                                                                  | 0.309<br>(0.550)                           | 0.298<br>(0.321) | Cl <sup>-</sup>                                                                                       | 0.000                     | 0.000    |
|                                   | NH <sub>4</sub> <sup>+</sup>                                                                                                     | 0.448<br>(0.654)                           | 0.433<br>(0.382) | NH <sub>4</sub> <sup>+</sup>                                                                          | 0.246                     | 0.333    |
|                                   | SO <sub>4</sub> <sup>2-</sup>                                                                                                    | 0.139<br>(0.204)                           | 0.134<br>(0.119) | SO <sub>4</sub> <sup>2-</sup>                                                                         | 0.246                     | 0.333    |
|                                   | total                                                                                                                            | 1.036<br>(1.712)                           | 1.000<br>(1.000) | total                                                                                                 | 0.738                     | 1.000    |
| <b>mol.m<sup>-3</sup></b>         | Second solubilized species:<br>NH <sub>4</sub> Cl=0.309 ; NH <sub>4</sub> NaSO <sub>4</sub> .2H <sub>2</sub> O=0.139             |                                            |                  | NH <sub>4</sub> NaSO <sub>4</sub> .2H <sub>2</sub> O= 0.246                                           |                           |          |
| <b>DRH<br/>75.8%</b>              | <b>Species</b>                                                                                                                   | <b>mol.m<sup>-3</sup><br/>(accumulate)</b> | <b>X</b>         | <b>Species</b>                                                                                        | <b>mol.m<sup>-3</sup></b> | <b>X</b> |
|                                   | Na <sup>+</sup>                                                                                                                  | 0.246<br>(0.550)                           | 0.333<br>(0.224) | Na <sup>+</sup>                                                                                       | 0.00                      | 0.00     |
|                                   | Cl <sup>-</sup>                                                                                                                  | 0.000<br>(0.550)                           | 0.000<br>(0.224) | Cl <sup>-</sup>                                                                                       | 0.00                      | 0.00     |
|                                   | NH <sub>4</sub> <sup>+</sup>                                                                                                     | 0.246<br>(0.900)                           | 0.333<br>(0.368) | NH <sub>4</sub> <sup>+</sup>                                                                          | 0.00                      | 0.00     |
|                                   | SO <sub>4</sub> <sup>2-</sup>                                                                                                    | 0.246<br>(0.450)                           | 0.333<br>(0.184) | SO <sub>4</sub> <sup>2-</sup>                                                                         | 0.00                      | 0.00     |
|                                   | total                                                                                                                            | 0.738<br>(2.450)                           | 1.000<br>(1.000) | total                                                                                                 | 0.00                      | 0.00     |
| <b>mol.m<sup>-3</sup></b>         | Last solubilized species:<br>NH <sub>4</sub> NaSO <sub>4</sub> .2H <sub>2</sub> O= 0.246                                         |                                            |                  | 0                                                                                                     |                           |          |

**Table S5.** E-AIM simulation of chemical species and concentrations, at different humidification levels, of a particle initially containing 0.67 mol.m<sup>-3</sup> of Na<sup>+</sup> and Cl<sup>-</sup>, 0.66 mol.m<sup>-3</sup> of NH<sub>4</sub><sup>+</sup> and 0.33 mol.m<sup>-3</sup> of SO<sub>4</sub><sup>2-</sup> (xNaCl = 0.67).

| State                             | Aqueous phase                                                                                                                   |                                            |                  | Solid phase                                                                                                                                    |                           |          |
|-----------------------------------|---------------------------------------------------------------------------------------------------------------------------------|--------------------------------------------|------------------|------------------------------------------------------------------------------------------------------------------------------------------------|---------------------------|----------|
| <b>Solid</b>                      | <b>Species</b>                                                                                                                  | <b>mol.m<sup>-3</sup></b>                  | <b>X</b>         | <b>Species</b>                                                                                                                                 | <b>mol.m<sup>-3</sup></b> | <b>X</b> |
|                                   | Na <sup>+</sup>                                                                                                                 | 0.000                                      | 0.000            | Na <sup>+</sup>                                                                                                                                | 0.670                     | 0.288    |
|                                   | Cl <sup>-</sup>                                                                                                                 | 0.000                                      | 0.000            | Cl <sup>-</sup>                                                                                                                                | 0.670                     | 0.288    |
|                                   | NH <sub>4</sub> <sup>+</sup>                                                                                                    | 0.000                                      | 0.000            | NH <sub>4</sub> <sup>+</sup>                                                                                                                   | 0.660                     | 0.283    |
|                                   | SO <sub>4</sub> <sup>2-</sup>                                                                                                   | 0.000                                      | 0.000            | SO <sub>4</sub> <sup>2-</sup>                                                                                                                  | 0.330                     | 0.141    |
|                                   | total                                                                                                                           | 0.000                                      | 0.000            | total                                                                                                                                          | 2.330                     | 1.000    |
| <b>mol.m<sup>-3</sup></b>         | 0                                                                                                                               |                                            |                  | NaCl= 0.110 ; NH <sub>4</sub> Cl= 0.560 ; Na <sub>2</sub> SO <sub>4</sub> = 0.235 ; NH <sub>4</sub> NaSO <sub>4</sub> .2H <sub>2</sub> O=0.095 |                           |          |
| <b>MDRH<sub>1</sub><br/>67.7%</b> | <b>Species</b>                                                                                                                  | <b>mol.m<sup>-3</sup></b>                  | <b>X</b>         | <b>Species</b>                                                                                                                                 | <b>mol.m<sup>-3</sup></b> | <b>X</b> |
|                                   | Na <sup>+</sup>                                                                                                                 | 0.020                                      | 0.269            | Na <sup>+</sup>                                                                                                                                | 0.650                     | 0.288    |
|                                   | Cl <sup>-</sup>                                                                                                                 | 0.030                                      | 0.397            | Cl <sup>-</sup>                                                                                                                                | 0.640                     | 0.284    |
|                                   | NH <sub>4</sub> <sup>+</sup>                                                                                                    | 0.020                                      | 0.265            | NH <sub>4</sub> <sup>+</sup>                                                                                                                   | 0.640                     | 0.284    |
|                                   | SO <sub>4</sub> <sup>2-</sup>                                                                                                   | 0.005                                      | 0.069            | SO <sub>4</sub> <sup>2-</sup>                                                                                                                  | 0.325                     | 0.144    |
|                                   | total                                                                                                                           | 0.076                                      | 1.000            | total                                                                                                                                          | 2.254                     | 1.000    |
| <b>mol.m<sup>-3</sup></b>         | First solubilized species: NaCl= 0.020 ; NH <sub>4</sub> Cl= 0.010 ; NH <sub>4</sub> NaSO <sub>4</sub> .2H <sub>2</sub> O=0.005 |                                            |                  | NaCl= 0.090 ; NH <sub>4</sub> Cl= 0.550 ; Na <sub>2</sub> SO <sub>4</sub> = 0.235 ; NH <sub>4</sub> NaSO <sub>4</sub> .2H <sub>2</sub> O=0.090 |                           |          |
| <b>MDRH<sub>2</sub><br/>68.4%</b> | <b>Species</b>                                                                                                                  | <b>mol.m<sup>-3</sup><br/>(accumulate)</b> | <b>X</b>         | <b>Species</b>                                                                                                                                 | <b>mol.m<sup>-3</sup></b> | <b>X</b> |
|                                   | Na <sup>+</sup>                                                                                                                 | 0.444<br>(0.463)                           | 0.245<br>(0.246) | Na <sup>+</sup>                                                                                                                                | 0.207                     | 0.465    |
|                                   | Cl <sup>-</sup>                                                                                                                 | 0.640<br>(0.670)                           | 0.354<br>(0.356) | Cl <sup>-</sup>                                                                                                                                | 0.000                     | 0.000    |
|                                   | NH <sub>4</sub> <sup>+</sup>                                                                                                    | 0.550<br>(0.570)                           | 0.304<br>(0.302) | NH <sub>4</sub> <sup>+</sup>                                                                                                                   | 0.090                     | 0.202    |
|                                   | SO <sub>4</sub> <sup>2-</sup>                                                                                                   | 0.177<br>(0.181)                           | 0.098<br>(0.096) | SO <sub>4</sub> <sup>2-</sup>                                                                                                                  | 0.148                     | 0.333    |
|                                   | total                                                                                                                           | 1.809<br>(1.884)                           | 1.000<br>(1.000) | total                                                                                                                                          | 0.445                     | 1.000    |
| <b>mol.m<sup>-3</sup></b>         | Second solubilized species: NaCl= 0.090 ; NH <sub>4</sub> Cl= 0.550 ; Na <sub>2</sub> SO <sub>4</sub> = 0.177                   |                                            |                  | NH <sub>4</sub> NaSO <sub>4</sub> .2H <sub>2</sub> O=0.090 ; Na <sub>2</sub> SO <sub>4</sub> = 0.058                                           |                           |          |
| <b>MDRH<sub>3</sub><br/>73.0%</b> | <b>Species</b>                                                                                                                  | <b>mol.m<sup>-3</sup><br/>(accumulate)</b> | <b>X</b>         | <b>Species</b>                                                                                                                                 | <b>mol.m<sup>-3</sup></b> | <b>X</b> |
|                                   | Na <sup>+</sup>                                                                                                                 | 0.207<br>(0.670)                           | 0.465<br>(0.288) | Na <sup>+</sup>                                                                                                                                | 0.000                     | 0.000    |
|                                   | Cl <sup>-</sup>                                                                                                                 | 0.000<br>(0.670)                           | 0.000<br>(0.288) | Cl <sup>-</sup>                                                                                                                                | 0.000                     | 0.000    |
|                                   | NH <sub>4</sub> <sup>+</sup>                                                                                                    | 0.090<br>(0.660)                           | 0.202<br>(0.283) | NH <sub>4</sub> <sup>+</sup>                                                                                                                   | 0.000                     | 0.000    |
|                                   | SO <sub>4</sub> <sup>2-</sup>                                                                                                   | 0.148<br>(0.330)                           | 0.333<br>(0.141) | SO <sub>4</sub> <sup>2-</sup>                                                                                                                  | 0.000                     | 0.000    |
|                                   | total                                                                                                                           | 0.445<br>(2.330)                           | 1.000<br>(1.000) | total                                                                                                                                          | 0.000                     | 0.000    |
| <b>mol.m<sup>-3</sup></b>         | Last solubilized species: Na <sub>2</sub> SO <sub>4</sub> = 0.058 ; NH <sub>4</sub> NaSO <sub>4</sub> .2H <sub>2</sub> O=0.090  |                                            |                  | 0                                                                                                                                              |                           |          |
